# Supplementary material for: Early Life Polychlorinated Biphenyl 126 Exposure Disrupts Gut Microbiota and Metabolic Homeostasis in Mice Fed with High-Fat Diet in Adulthood
Source: MDPI journal article supplement (doi:10.3390/metabo12100894), 2022-09-23
Supplement: s1 [file s1]

# Early Life Polychlorinated Biphenyl 126 Exposure Disrupts Gut Microbiota and Metabolic Homeostasis in Mice Fed with High-Fat Diet in Adulthood

Yuan Tian <sup>1</sup>, Bipin Rimal <sup>1</sup>, Wei Gui <sup>2</sup>, Imhoi Koo <sup>1</sup>, Philip B. Smith <sup>2</sup>, Shigetoshi Yokoyama <sup>1</sup> and Andrew D. Patterson <sup>1,\*</sup>

<sup>1</sup> Department of Veterinary and Biomedical Sciences, The Pennsylvania State University, University Park, PA 16802, USA

<sup>2</sup> Huck Institutes of the Life Sciences, The Pennsylvania State University, University Park, PA 16802, USA

\* Correspondence: [adp117@psu.edu](mailto:adp117@psu.edu)

\*To whom correspondence should be addressed. Email: [adp117@psu.edu](mailto:adp117@psu.edu). Address: 322

Life Science Bldg, University Park, PA 16802, Phone: 814-867-4565

**Table S1.** Composition of control diet (CTRL) F4031 and high fat diet (HFD) F3282.

| <b>Component (%)<sup>1</sup></b> | <b>CTRL</b> | <b>HFD</b> |
|----------------------------------|-------------|------------|
| Protein                          | 20.5        | 20.5       |
| Fat                              | 7.2         | 36         |
| Fiber                            | 0           | 0          |
| Ash                              | 3.5         | 3.5        |
| Moisture                         | <10         | <10        |
| Carbohydrate                     | 61.6        | 35.7       |

<sup>1</sup>These components are reported on a % dry matter basis.

**Table S2.** mRNA gene-targeted primers used in this study

| Gene                                                        | Abbreviation | Sequence (5'-3')                                             |
|-------------------------------------------------------------|--------------|--------------------------------------------------------------|
| Cytochrome P450, family 1, member A1                        | Cyp1a1       | CTCTTCCCTGGATGCCTTGAA<br>GGATGTGGCCCTTCTCAAATG               |
| Cytochrome P450, family 1, member A2                        | Cyp1a2       | GCCCCTGCCCTTCAGTGGTACAG<br>AGGAGTGGAGCCGATGCGGA              |
| Cytochrome P450, family 1, member B1                        | Cyp1b1       | GTCTGTGAATCATGACCCAGC<br>ACAGTTCCTCACCGATGCAC                |
| NAD(P)H Quinone Dehydrogenase 1                             | Nqo1         | TTCTGTGGCTTCCAGGTCTT<br>AGGCTGCTTGGAGCAAAATA                 |
| Tumor necrosis factor alpha                                 | Tnf          | GATCTCAAAGACAACCAACATGTG<br>CTCCAGCTGGAAGACTCCTCCCAG         |
| Interleukin 1 $\beta$                                       | Il1 $\beta$  | CCTTCCAGGATGAGGACATGA<br>TGAGTCACAGAGGATGGGCTC               |
| Interleukin 6                                               | Il6          | GAGGATAACCACTCCCAACAGACC<br>AAGTGCATCATCGTTGTTTCATACA        |
| Monocyte chemoattractant protein-1                          | Mcp1         | TGATCCCAATGAGTAGGCTGGAG<br>ATGTCTGGACCCATTCTTCTTG            |
| Regulated on activation, normal T<br>expressed and secreted | Rantes       | CCAATCTTGCAGTCGTGTTTGT<br>CATCTCCAAATAGTTGATGTATTCTTG<br>AAC |
| Prostaglandin-endoperoxide synthase 2                       | Ptgs2        | GCTTCAAACAGTTTCTCTACAACAA<br>CATTCTTCCCCCAGCAAC              |
| Stearoyl-CoA desaturase-1                                   | Scd1         | TTCTTGCGATACTCTGGTGC<br>CGGGATTGAATGTTCTTGTCGT               |
| Cluster of differentiation 36                               | Cd36         | TGGCCTTACTTGGGATTGG<br>CCAGTGTATATGTAGGCTCATCCA              |
| Acetyl-CoA carboxylase alpha                                | Acaca        | TAACAGAATCGACACTGGCTGGCT<br>ATGCTGTTCCCTCAGGCTCACATCT        |
| Carnitine palmitoyltransferase 1A                           | Cpt1a        | CGTGACGTTGGAATC<br>TCTGCGTTTATGCCTATC                        |
| Diacylglycerol O-Acyltransferase 2                          | Dgat2        | CGCAGCGAAAACAAGAATAA<br>GAAGATGTCTTGGAGGGCTG                 |
| Fatty acid synthase                                         | Fasn         | GGTGTGGTGGGTTTGGTGAATTGT<br>TCACGAGGTCATGCTTTAGCACCT         |
| Phosphoenolpyruvate carboxykinase                           | Pepck        | GGCCACAGCTGCTGCAG<br>GGTCGCATGGCAAAGGG                       |

|                                             |        |                                                        |
|---------------------------------------------|--------|--------------------------------------------------------|
| Glucose-6-phosphatase                       | G6pase | CTGTGAGACCGGACCAGGA<br>GACCATAACATAGTATACACCTGCTG<br>C |
| Glucokinase                                 | Gck    | CAACTGGACCAAGGGCTTCAA<br>TGTGGCCACCGTGTTCATTC          |
| Pyruvate carboxylase                        | Pcx    | GGACTCCTTTGGACACAGAG<br>AATCTCATTCTCATAACGTCGG         |
| Phosphoenolpyruvate carboxykinase 1         | Pck1   | CCATCCCAACTCGAGATTCTG<br>CTGAGGGCTTCATAGACAAGG         |
| Fructose-1,6-bisphosphatase 1               | Fbp1   | CTGATATTCACCGCACTCTGG<br>CGGCCTTCTCCATGACATAAG         |
| Glyceraldehyde-3-phosphate<br>dehydrogenase | Gapdh  | CCTCGTCCCGTAGACAAAATG<br>TGAAGGGGTCGTTGATGGC           |

**Table S3.** Serum cytokine (32-Plex) assay results.

| Unit:<br>pg/mL                 | CTRL                        |                 |                   | HFD            |                |         |
|--------------------------------|-----------------------------|-----------------|-------------------|----------------|----------------|---------|
|                                | Vehicle                     | PCB 126         | P value           | Vehicle        | PCB 126        | P value |
| <b>Eotaxin</b>                 | 1889.0 ± 354.9 <sup>1</sup> | 1710.5 ± 660.5  | 0.57 <sup>2</sup> | 1484.8 ± 271.9 | 1422.3 ± 704.0 | 0.85    |
| <b>G-CSF<sup>3</sup></b>       | 689.6 ± 234.6               | 842.8 ± 477.3   | 0.50              | 587.4 ± 276.0  | 803.2 ± 366.5  | 0.28    |
| <b>GM-CSF</b>                  | 38.5 ± 22.5                 | 36.8 ± 16.1     | 0.93              | 37.2 ± 40.6    | 29.9 ± 6.3     | 0.75    |
| <b>IFN<math>\gamma</math></b>  | 3.85 ± 1.88                 | 4.70 ± 2.94     | 0.60              | 8.35 ± 8.45    | 3.40 ± 1.56    | 0.21    |
| <b>IL-1<math>\alpha</math></b> | 1087.1 ± 666.0              | 1342.3 ± 1088.2 | 0.64              | 428.1 ± 160.3  | 468.8 ± 704.1  | 0.90    |
| <b>IL-1<math>\beta</math></b>  | 14.8 ± 6.2                  | 31.7 ± 24.5     | 0.20              | 23.8 ± 10.5    | 24.6 ± 22.7    | 0.94    |
| <b>IL-2</b>                    | 20.0 ± 10.2                 | 17.6 ± 7.2      | 0.66              | 26.8 ± 18.7    | 12.5 ± 6.4     | 0.12    |
| <b>IL-3</b>                    | 3.09 ± 1.75                 | 3.40 ± 0.67     | 0.75              | 1.93 ± 0.89    | 1.43 ± 0.98    | 0.60    |
| <b>IL-4</b>                    | 1.27 ± 0.67                 | 1.25 ± 0.52     | 0.96              | 1.30 ± 0.84    | 2.33 ± 1.95    | 0.32    |
| <b>IL-5</b>                    | 18.0 ± 4.6                  | 16.4 ± 3.2      | 0.49              | 24.1 ± 10.2    | 26.2 ± 8.2     | 0.69    |
| <b>IL-6</b>                    | 8.25 ± 3.47                 | 7.24 ± 3.10     | 0.61              | 15.7 ± 5.1     | 16.0 ± 9.1     | 0.94    |
| <b>IL-7</b>                    | 16.7 ± 6.7                  | 13.5 ± 4.3      | 0.38              | 22.7 ± 14.1    | 11.6 ± 5.1     | 0.12    |
| <b>IL-9</b>                    | 53.5 ± 13.6                 | 45.4 ± 10.1     | 0.29              | 46.6 ± 8.2     | 60.7 ± 23.1    | 0.21    |
| <b>IL-10</b>                   | 22.0 ± 11.3                 | 18.2 ± 14.1     | 0.67              | 21.1 ± 10.4    | 22.6 ± 12.8    | 0.83    |
| <b>IL-12p40</b>                | 58.6 ± 19.2                 | 52.3 ± 17.7     | 0.57              | 55.8 ± 23.7    | 42.3 ± 17.2    | 0.32    |
| <b>IL-12p70</b>                | 52.5 ± 26.6                 | 50.7 ± 32.1     | 0.93              | 47.9 ± 27.7    | 69.7 ± 40.3    | 0.37    |
| <b>IL-13</b>                   | 95.5 ± 16.1                 | 88.0 ± 28.9     | 0.62              | 90.8 ± 23.4    | 79.4 ± 13.1    | 0.33    |
| <b>IL-15</b>                   | 158.5 ± 71.8                | 190.1 ± 106.5   | 0.57              | 209.4 ± 117.5  | 169.1 ± 111.4  | 0.56    |
| <b>IL-17</b>                   | 34.9 ± 12.1                 | 28.4 ± 8.7      | 0.31              | 35.9 ± 18.7    | 34.0 ± 14.3    | 0.85    |

|                                 |               |               |      |  |                |               |             |
|---------------------------------|---------------|---------------|------|--|----------------|---------------|-------------|
| <b>IP-10</b>                    | 236.3 ± 29.2  | 226.4 ± 29.0  | 0.57 |  | 321.7 ± 90.0   | 248.8 ± 68.4  | 0.15        |
| <b>KC</b>                       | 198.3 ± 47.6  | 183.1 ± 103.0 | 0.77 |  | 268.2 ± 188.6  | 184.3 ± 90.5  | 0.36        |
| <b>LIF</b>                      | 2.23 ± 1.81   | 3.87 ± 4.68   | 0.45 |  | 1.94 ± 0.86    | 0.94 ± 0.48   | <b>0.04</b> |
| <b>LIX</b>                      | 3478 ± 895    | 4129 ± 1736   | 0.44 |  | 4909 ± 2654    | 12440 ± 4517  | <b>0.01</b> |
| <b>MCP-1</b>                    | 106.9 ± 30.5  | 96.8 ± 19.2   | 0.52 |  | 140.6 ± 29.1   | 115.0 ± 22.0  | 0.12        |
| <b>M-CSF</b>                    | 31.6 ± 10.6   | 29.9 ± 16.0   | 0.84 |  | 28.8 ± 18.2    | 22.1 ± 11.0   | 0.47        |
| <b>MIG</b>                      | 950.6 ± 324.2 | 855.9 ± 355.1 | 0.64 |  | 1346.1 ± 704.3 | 933.8 ± 693.5 | 0.33        |
| <b>MIP-1<math>\alpha</math></b> | 148.7 ± 25.6  | 150.0 ± 55.5  | 0.96 |  | 161.5 ± 51.7   | 140.9 ± 46.0  | 0.50        |
| <b>MIP-1B</b>                   | 203.4 ± 65.3  | 118.9 ± 71.9  | 0.08 |  | 155.1 ± 65.5   | 79.1 ± 79.3   | 0.10        |
| <b>MIP-2</b>                    | 377.7 ± 92.5  | 425.4 ± 285.6 | 0.71 |  | 283.5 ± 118.9  | 181.1 ± 103.1 | 0.19        |
| <b>RANTES</b>                   | 74.1 ± 37.8   | 94.7 ± 30.4   | 0.34 |  | 59.6 ± 18.5    | 84.6 ± 22.1   | 0.06        |
| <b>TNF<math>\alpha</math></b>   | 21.3 ± 5.9    | 22.0 ± 7.2    | 0.85 |  | 24.4 ± 5.9     | 22.1 ± 7.9    | 0.59        |
| <b>VEGF</b>                     | 1.97 ± 0.50   | 2.01 ± 0.49   | 0.88 |  | 2.06 ± 0.86    | 1.62 ± 0.88   | 0.41        |

<sup>1</sup>Values are means ± S.D. (n = 6 per group).

<sup>2</sup>Two-tailed unpaired t test analyses were performed.

<sup>3</sup>G-CSF: granulocyte colony stimulating factor; GM-CSF: Granulocyte/macrophage colony stimulating factor; IFN $\gamma$ : interferon gamma; IL: interleukin; IP-10: interferon gamma inducible protein 10; KC: keratinocyte chemoattractant; LIF: leukaemia inhibitory factor; LIX: lipopolysaccharide-induced CXC chemokine; MCP-1: monocyte chemoattractant protein-1; M-CSF: macrophage colony-stimulating factor; MIG: monokine induced by IFN- $\gamma$ ; MIP: macrophage inflammatory protein; RANTES:

regulated upon activation, normal T cell expressed and presumably secreted;  $\text{TNF}\alpha$ : tumor necrosis factor alpha; VEGF: vascular endothelial growth factor.

**Table S4.** Relative abundances of significantly changed genus in mice fed with CTRL.

| <b>Genus</b>              | <b>Phylum</b>          | <b>Vehicle</b>           | <b>PCB 126</b> | <b>P value</b>     |
|---------------------------|------------------------|--------------------------|----------------|--------------------|
| <i>Lacrimispora</i>       | <i>Firmicutes</i>      | 0.48 ± 0.06 <sup>1</sup> | 0.36 ± 0.03    | 0.002 <sup>2</sup> |
| <i>Anaerocolumna</i>      | <i>Firmicutes</i>      | 0.34 ± 0.04              | 0.25 ± 0.03    | 0.003              |
| <i>Anaerobutyricum</i>    | <i>Firmicutes</i>      | 0.23 ± 0.03              | 0.17 ± 0.02    | 0.004              |
| <i>Anaerostipes</i>       | <i>Firmicutes</i>      | 0.46 ± 0.05              | 0.37 ± 0.03    | 0.007              |
| <i>Mediterraneibacter</i> | <i>Firmicutes</i>      | 0.39 ± 0.06              | 0.30 ± 0.03    | 0.008              |
| <i>Blautia</i>            | <i>Firmicutes</i>      | 2.89 ± 0.35              | 2.31 ± 0.26    | 0.01               |
| <i>Butyrivibrio</i>       | <i>Firmicutes</i>      | 0.41 ± 0.05              | 0.33 ± 0.04    | 0.01               |
| <i>Bacillus</i>           | <i>Firmicutes</i>      | 0.38 ± 0.04              | 0.32 ± 0.04    | 0.02               |
| <i>Clostridioides</i>     | <i>Firmicutes</i>      | 0.78 ± 0.10              | 0.61 ± 0.10    | 0.02               |
| <i>Hungatella</i>         | <i>Firmicutes</i>      | 0.41 ± 0.04              | 0.35 ± 0.04    | 0.03               |
| <i>Eubacterium</i>        | <i>Firmicutes</i>      | 0.46 ± 0.05              | 0.39 ± 0.06    | 0.04               |
| <i>Lachnoclostridium</i>  | <i>Firmicutes</i>      | 7.54 ± 1.11              | 6.16 ± 0.82    | 0.04               |
| <i>Ruthenibacterium</i>   | <i>Firmicutes</i>      | 0.35 ± 0.04              | 0.28 ± 0.06    | 0.04               |
| <i>Roseburia</i>          | <i>Firmicutes</i>      | 1.20 ± 0.17              | 1.00 ± 0.11    | 0.04               |
| <i>Streptococcus</i>      | <i>Firmicutes</i>      | 0.41 ± 0.06              | 0.34 ± 0.04    | 0.04               |
| <i>Caproiciproducens</i>  | <i>Firmicutes</i>      | 0.20 ± 0.02              | 0.17 ± 0.02    | 0.04               |
| <i>Akkermansia</i>        | <i>Verrucomicrobia</i> | 11.18 ± 4.92             | 21.79 ± 5.37   | 0.004              |

<sup>1</sup>These are percent relative abundances. Values are means ± S.D. (n = 6 per group).

<sup>2</sup>Two-tailed Unpaired t test analyses were performed.



**Table S5.** Relative abundances of significantly changed genus in mice fed with HFD.

| <b>Genus</b>           | <b>Phylum</b>         | <b>Vehicle</b>             | <b>PCB 126</b> | <b>P value</b>    |
|------------------------|-----------------------|----------------------------|----------------|-------------------|
| <i>Muribaculum</i>     | <i>Bacteroidetes</i>  | 0.025 ± 0.007 <sup>1</sup> | 0.016 ± 0.005  | 0.02 <sup>2</sup> |
| <i>Duncaniella</i>     | <i>Bacteroidetes</i>  | 0.018 ± 0.005              | 0.011 ± 0.003  | 0.02              |
| <i>Romboutsia</i>      | <i>Firmicutes</i>     | 0.012 ± 0.004              | 0.018 ± 0.004  | 0.04              |
| <i>Bacteroides</i>     | <i>Bacteroidetes</i>  | 0.011 ± 0.002              | 0.007 ± 0.002  | 0.02              |
| <i>Adlercreutzia</i>   | <i>Actinobacteria</i> | 0.002 ± 0.001              | 0.004 ± 0.002  | 0.04              |
| <i>Prevotella</i>      | <i>Bacteroidetes</i>  | 0.003 ± 0.001              | 0.002 ± 0.001  | 0.03              |
| <i>Parabacteroides</i> | <i>Bacteroidetes</i>  | 0.002 ± 0.000              | 0.001 ± 0.0000 | 0.02              |

<sup>1</sup>These are percent relative abundances. Values are means ± S.D. (n = 6 per group).

<sup>2</sup> Two-tailed unpaired t test analyses were performed.

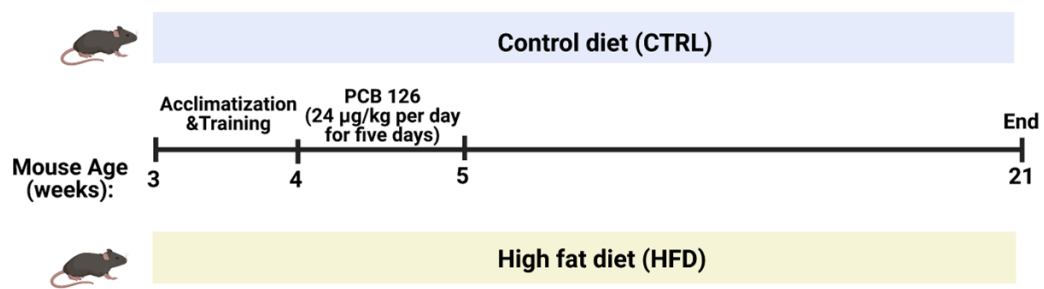

**Figure S1.** Experimental schedule of the present study.

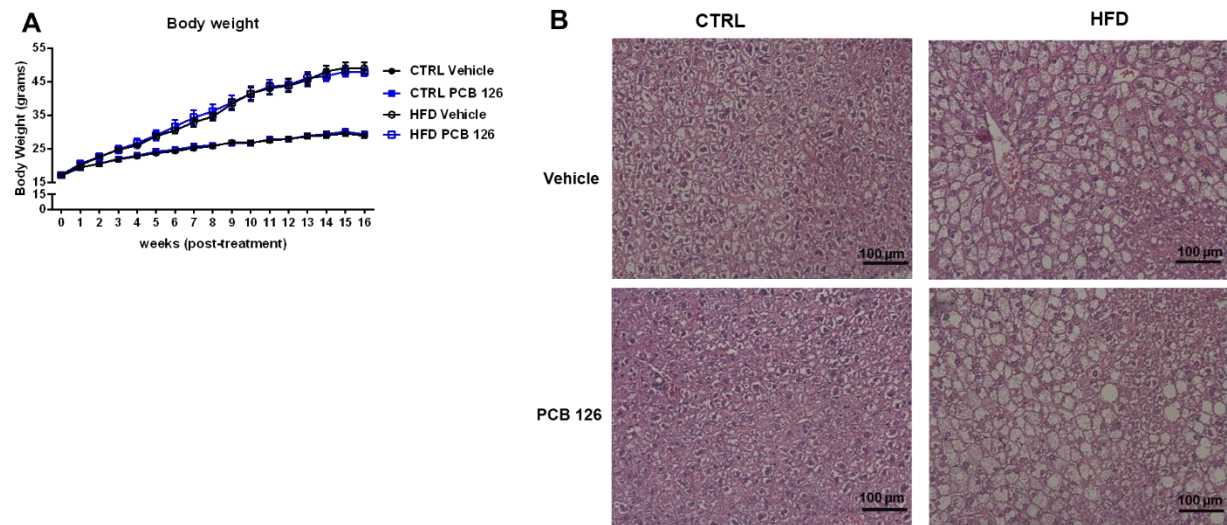

**Figure S2.** (A) Body weight of mice recorded every week from CTRL or HFD-fed mice with vehicle or PCB 126 exposure. (B) Light microscopic examination of H&E-stained liver sections from CTRL or HFD-fed mice with vehicle or PCB 126 exposure. Values are means  $\pm$  S.D. (n = 6 per group).

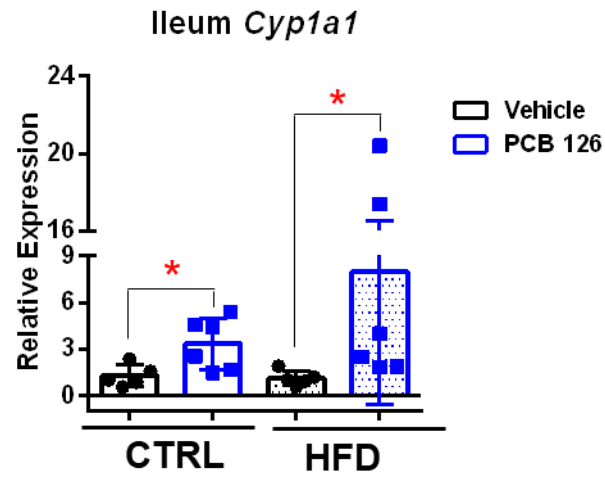

**Figure S3.** qPCR analysis of mRNA levels of AHR targeted gene in the ileum from CTRL or HFD-fed mice with vehicle or PCB 126 exposure. Values are means  $\pm$  S.D. (n = 6 per group). \*  $p < 0.05$  compared to vehicle

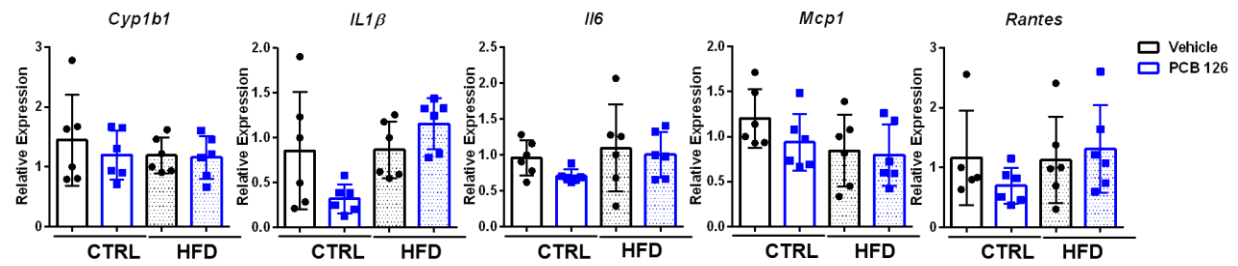

**Figure S4.** qPCR analysis of mRNA levels of inflammatory cytokines in the adipose from CTRL or HFD-fed mice with vehicle or PCB 126 exposure. Values are means  $\pm$  S.D. (n = 6 per group).

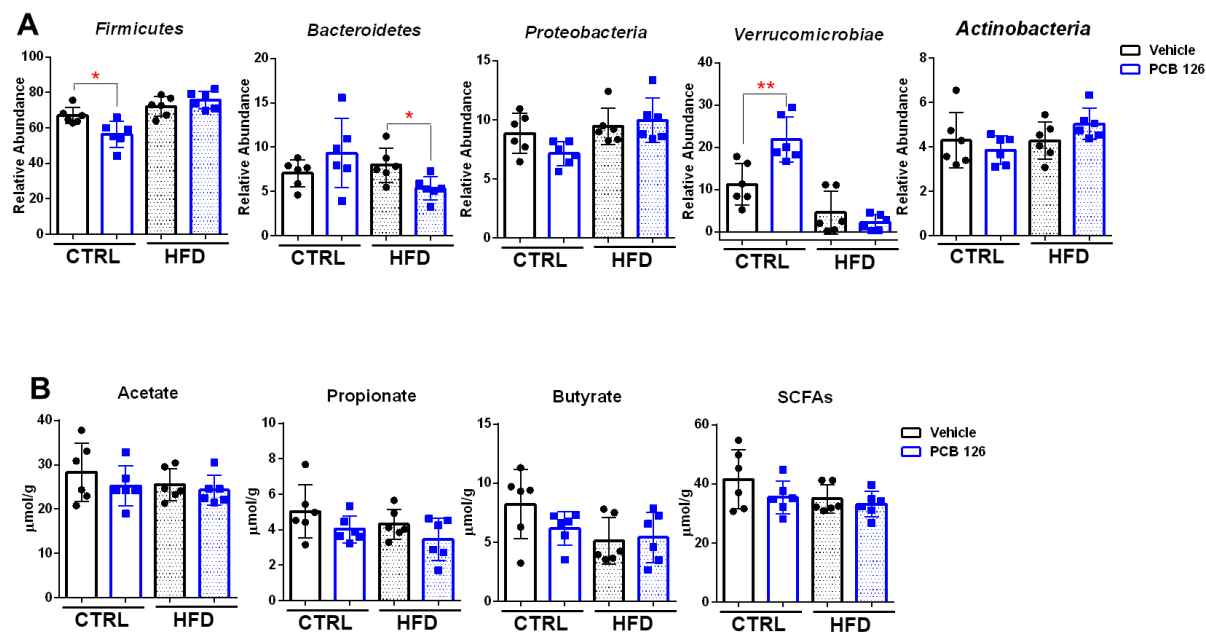

**Figure S5.** (A) Relative abundance of cecal bacteria from phylum in cecal content from CTRL or HFD-fed mice with vehicle or PCB 126 exposure. (B) NMR analysis of cecal short-chain fatty acids (SCFAs) from CTRL or HFD-fed mice with vehicle or PCB 126 exposure. Values are means  $\pm$  S.D. (n = 6 per group). \*  $p < 0.05$ , \*\*  $p < 0.01$  compared to vehicle

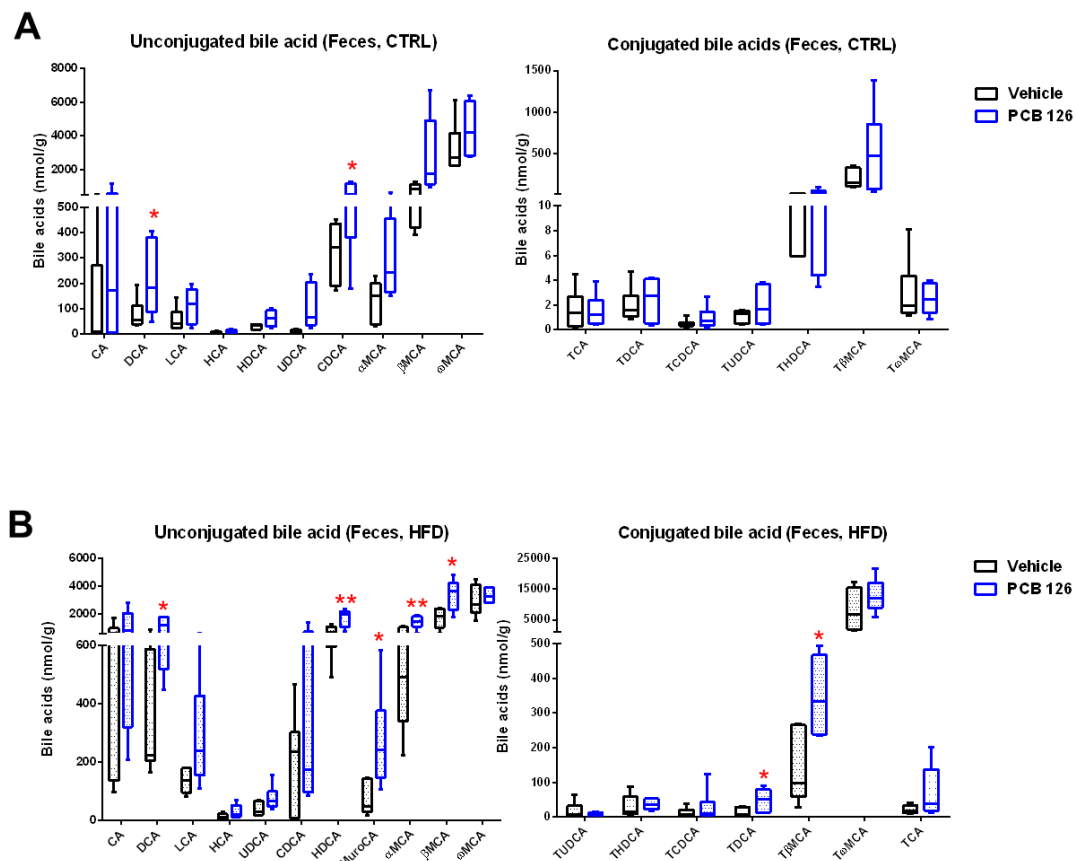

**Figure S6.** (A-B) Quantitative UPLC-MS analysis of bile acids in the feces from CTRL (A) or HFD-fed (B) mice with vehicle or PCB 126 exposure. Values are median and interquartile range (n = 6 per group). \*  $p < 0.05$ , \*\*  $p < 0.01$  compared to vehicle. CA, cholic acid; DCA, deoxycholic acid; LCA, lithocholic acid; UDCA, ursodeoxycholic acid; CDCA, chenodeoxycholic acid; HDCA, hydoxycholic acid; MuroCA, murocholic acid; MCA, muricholic acid; T, taurine-conjugated species.
